# Supplementary material for: Highly dispersed MnOx–FeOx supported by silicalite-1 for the selective catalytic reduction of NOx with NH3 at low temperatures
Source: Royal Society of Chemistry journal article supplement (doi:10.1039/d0cy00001a), 2020-01-01
Supplement: d0cy00001a1.pdf [file d0cy00001a1.pdf]

Supporting Information

**Highly dispersed MnO<sub>x</sub>-FeO<sub>x</sub> supported by silicalite-1 for the Selective Catalytic Reduction of NO<sub>x</sub>  
with NH<sub>3</sub> at low temperatures**

*Jialiang Gu<sup>a</sup>, Bingjun Zhu<sup>b</sup>, Rudi Duan<sup>a</sup>, Yan Chen<sup>c</sup>, Shaoxin Wang<sup>a</sup>, Lili Liu<sup>a</sup>, Xidong Wang<sup>a\*</sup>*

*<sup>a</sup>Beijing Key Laboratory for Solid Waste Utilization and Management, Department of Energy and Resources Engineering, College of Engineering, Peking University, Beijing 100871, PR China*

*<sup>b</sup>School of Space and Environment, Beihang University, Beijing 100191, PR China*

*<sup>c</sup>State Key Joint Laboratory of Environment Simulation and Pollution Control, School of Environment, Tsinghua University, Beijing, 100084, PR China*

*\*E-mail: xidong@pku.edu.cn*

**Table S1** Detailed consumptions of raw materials

**Table S2** Detailed deconvolution parameters of Mn 2p and Fe 2p in different catalysts

**Fig. S1** XRD patterns of MnO<sub>x</sub>-FeO<sub>x</sub>-loaded catalysts

**Fig. S2** N<sub>2</sub> adsorption isotherms and corresponding pore size distribution of Silicalite-1.

(a) Microporous range; (b) Mesoporous range

**Fig. S3** N<sub>2</sub> adsorption isotherms and corresponding pore size distribution of MnO<sub>x</sub>-FeO<sub>x</sub>-loaded catalysts.

(a) MnO<sub>x</sub>/Silicalite-1; (b) MnO<sub>x</sub>-(0.2) FeO<sub>x</sub>/Silicalite-1; (c) MnO<sub>x</sub>-(0.4) FeO<sub>x</sub>/Silicalite-1;

(d) MnO<sub>x</sub>-(0.6) FeO<sub>x</sub>/Silicalite-1; (e) MnO<sub>x</sub>-(0.8) FeO<sub>x</sub>/Silicalite-1; (f) FeO<sub>x</sub>/Silicalite-1

**Table S1** Detailed consumptions of raw materials

| Samples                                                | Mn (NO <sub>3</sub> ) <sub>2</sub> , 50 wt%<br>aqueous solution/g | Fe (NO <sub>3</sub> ) <sub>3</sub> ·9H <sub>2</sub> O,<br>99.9%, powder/g | Silicalite-1,<br>powder/g | Mass ratios of<br>Fe/(Mn+Fe) |
|--------------------------------------------------------|-------------------------------------------------------------------|---------------------------------------------------------------------------|---------------------------|------------------------------|
| MnO <sub>x</sub> /Silicalite-1                         | 0.3254                                                            | 0                                                                         | 1.00                      | 0                            |
| MnO <sub>x</sub> -(0.2) FeO <sub>x</sub> /Silicalite-1 | 0.2603                                                            | 0.0721                                                                    | 1.00                      | 0.2                          |
| MnO <sub>x</sub> -(0.4) FeO <sub>x</sub> /Silicalite-1 | 0.1952                                                            | 0.1443                                                                    | 1.00                      | 0.4                          |
| MnO <sub>x</sub> -(0.6) FeO <sub>x</sub> /Silicalite-1 | 0.1301                                                            | 0.2164                                                                    | 1.00                      | 0.6                          |
| MnO <sub>x</sub> -(0.8) FeO <sub>x</sub> /Silicalite-1 | 0.0651                                                            | 0.2886                                                                    | 1.00                      | 0.8                          |
| FeO <sub>x</sub> /Silicalite-1                         | 0                                                                 | 0.3607                                                                    | 1.00                      | 1.0                          |

**Table S2** Detailed deconvolution parameters of Mn 2p and Fe 2p in different catalysts.

| Samples                                                | Mn 2p <sub>3/2</sub> (eV)* |                  |                  | Fe 2p <sub>3/2</sub> (eV)# |                  |
|--------------------------------------------------------|----------------------------|------------------|------------------|----------------------------|------------------|
|                                                        | Mn <sup>2+</sup>           | Mn <sup>3+</sup> | Mn <sup>4+</sup> | Fe <sup>2+</sup>           | Fe <sup>3+</sup> |
| MnO <sub>x</sub> /Silicalite-1                         | 641.91                     | 643.00           | 645.50           | —                          | —                |
| MnO <sub>x</sub> -(0.2) FeO <sub>x</sub> /Silicalite-1 | 641.49                     | 642.85           | 645.50           | 711.00                     | 713.00           |
| MnO <sub>x</sub> -(0.4) FeO <sub>x</sub> /Silicalite-1 | 641.28                     | 642.46           | 644.61           | 710.75                     | 713.00           |
| MnO <sub>x</sub> -(0.6) FeO <sub>x</sub> /Silicalite-1 | 641.20                     | 642.48           | 644.97           | 710.74                     | 713.00           |
| MnO <sub>x</sub> -(0.8) FeO <sub>x</sub> /Silicalite-1 | 641.68                     | 642.52           | 646              | 710.73                     | 712.72           |
| FeO <sub>x</sub> /Silicalite-1                         | —                          | —                | —                | 710.84                     | 712.69           |

\* $\Delta E = 11.4$  eV for Mn 2p<sub>3/2</sub> and Mn 2p<sub>1/2</sub>

# $\Delta E = 13.6$  eV for Fe 2p<sub>3/2</sub> and Fe 2p<sub>1/2</sub>

$\Delta E$  stands for the binding energy gap for 2p<sub>1/2</sub> and 2p<sub>3/2</sub>

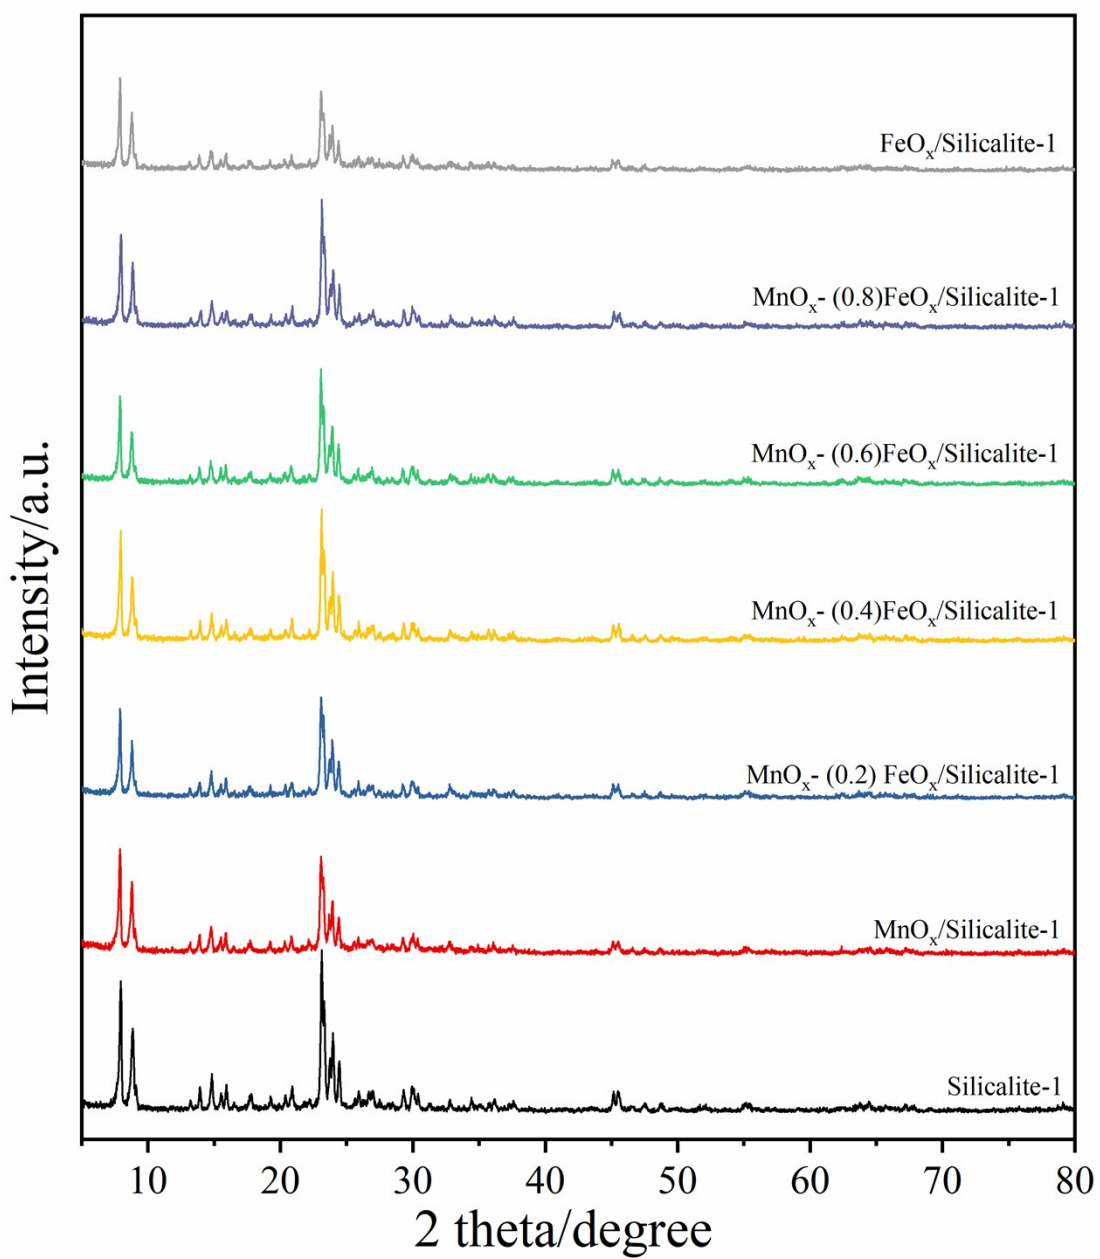

**Fig. S1** XRD patterns of MnO<sub>x</sub>-FeO<sub>x</sub>-loaded catalysts

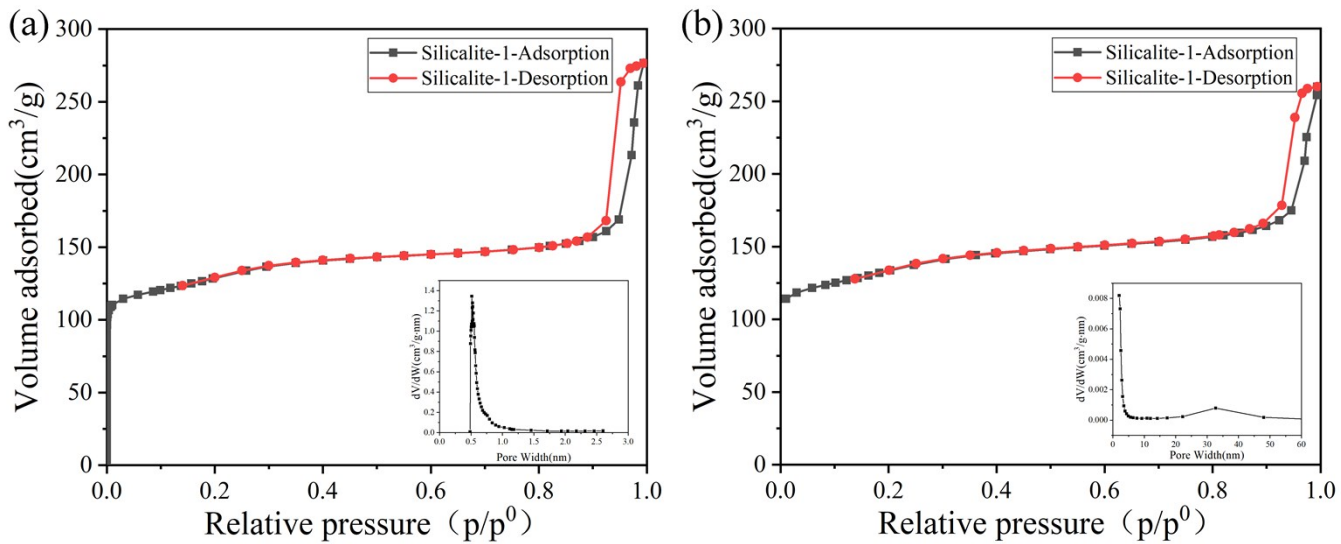

**Fig. S2** N<sub>2</sub> adsorption isotherms and corresponding pore size distribution of Silicalite-1.

(a) Microporous range; (b) Mesoporous range

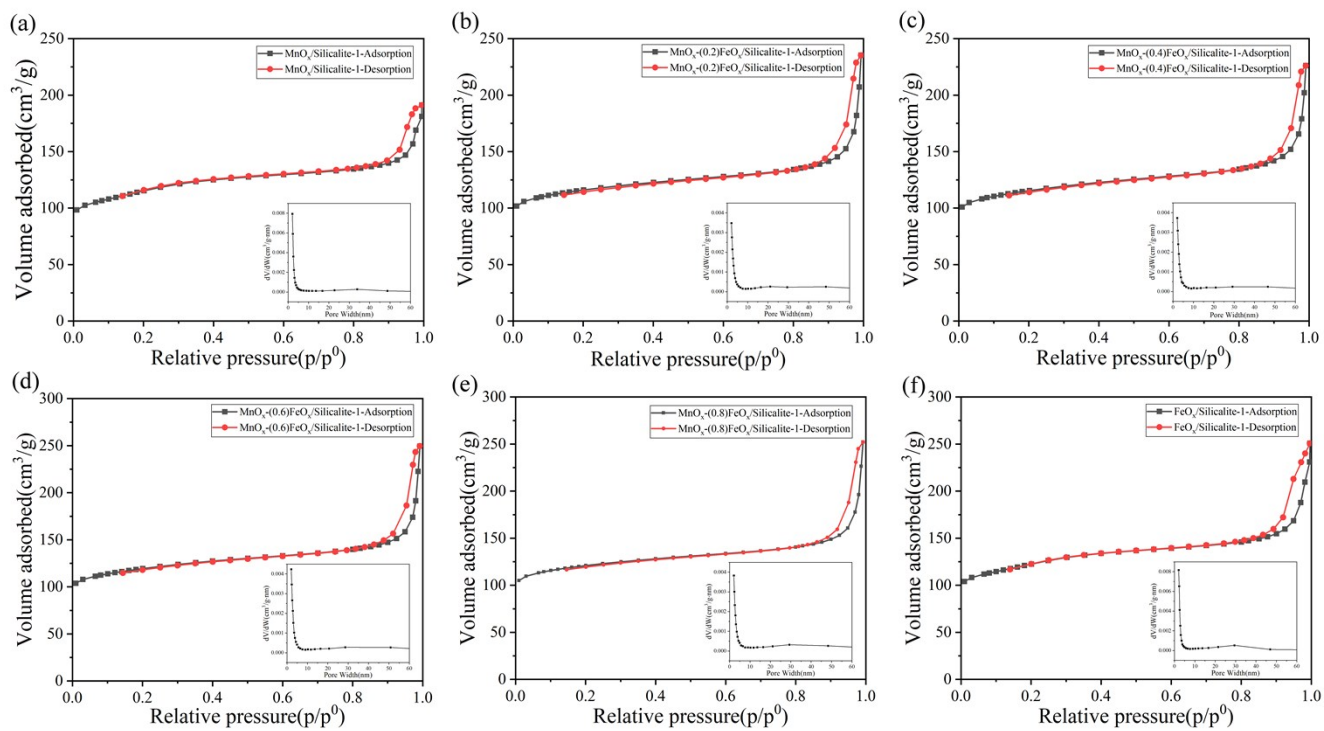

**Fig. S3** N<sub>2</sub> adsorption isotherms and corresponding pore size distribution of MnO<sub>x</sub>-FeO<sub>x</sub>-loaded catalysts.

(a) MnO<sub>x</sub>/Silicalite-1; (b) MnO<sub>x</sub>-(0.2) FeO<sub>x</sub>/Silicalite-1; (c) MnO<sub>x</sub>-(0.4) FeO<sub>x</sub>/Silicalite-1;

(d) MnO<sub>x</sub>-(0.6) FeO<sub>x</sub>/Silicalite-1; (e) MnO<sub>x</sub>-(0.8) FeO<sub>x</sub>/Silicalite-1; (f) FeO<sub>x</sub>/Silicalite-1
